# Supplementary material for: Autozygosity influences cardiometabolic disease-associated traits in the AWI-Gen sub-Saharan African study
Source: PubMed Central journal article supplement (PMC7666169; doi:10.1038/s41467-020-19595-y), 2020-11-13

## Supplementary Tables and Figures

**Supplementary Table 1.  $\beta_{F_{ROH}}$  and  $\beta_{F_{outside\_ROH}}$  estimates for the AWI-Gen cohort.** Samples sizes (N), inbreeding depression effect size estimates (Beta), standard errors (SE) and associated p-values are shown for the genomic inbreeding coefficient with ROH longer than 1.5Mb ( $F_{ROH}$ ) and for the homozygosity outside ROH ( $F_{outside\_ROH}$ ). The whole AWI-Gen cohort is represented in this table, results are provided for the whole population (All) and by sex.

| Phenotype        |       | N     | $F_{ROH}$ |       |          | $F_{outside\_ROH}$ |        |          |
|------------------|-------|-------|-----------|-------|----------|--------------------|--------|----------|
|                  |       |       | Beta      | SE    | P        | Beta               | SE     | P        |
| SES              | All   | 10191 | -7.19     | 1.92  | 1.83E-04 | -2.86              | 7.15   | 6.89E-01 |
|                  | Men   | 4680  | -7.15     | 2.60  | 6.04E-03 | -17.14             | 10.96  | 1.18E-01 |
|                  | Women | 5511  | -7.23     | 2.84  | 1.10E-02 | -11.23             | 9.25   | 2.25E-01 |
| Height           | All   | 10174 | -0.13     | 0.10  | 1.66E-01 | 0.45               | 0.35   | 2.00E-01 |
|                  | Men   | 4676  | 0.09      | 0.14  | 5.18E-01 | 0.22               | 0.57   | 7.00E-01 |
|                  | Women | 5498  | -0.39     | 0.13  | 3.51E-03 | 0.58               | 0.44   | 1.85E-01 |
| Weight           | All   | 10172 | -80.09    | 21.88 | 2.53E-04 | -95.75             | 81.03  | 2.37E-01 |
|                  | Men   | 4675  | -197.47   | 28.08 | 2.31E-12 | -4.57              | 108.23 | 9.66E-01 |
|                  | Women | 5497  | 60.62     | 33.71 | 7.22E-02 | -122.25            | 109.86 | 2.66E-01 |
| BMI              | All   | 10171 | -27.75    | 7.96  | 4.95E-04 | -60.50             | 29.49  | 4.02E-02 |
|                  | Men   | 4675  | -83.68    | 9.52  | 2.15E-18 | -8.97              | 34.88  | 7.97E-01 |
|                  | Women | 5496  | 39.56     | 12.79 | 1.99E-03 | -76.92             | 41.61  | 6.46E-02 |
| Waist/Hip        | All   | 10157 | 0.28      | 0.19  | 1.37E-01 | 0.17               | 0.70   | 8.07E-01 |
|                  | Men   | 4670  | 0.14      | 0.24  | 5.70E-01 | -0.62              | 1.12   | 5.80E-01 |
|                  | Women | 5487  | 0.46      | 0.30  | 1.22E-01 | 0.49               | 0.89   | 5.86E-01 |
| Visceral Fat     | All   | 9786  | -4.35     | 2.60  | 9.35E-02 | -2.34              | 9.55   | 8.07E-01 |
|                  | Men   | 4541  | -0.66     | 3.43  | 8.48E-01 | -0.36              | 14.06  | 9.80E-01 |
|                  | Women | 5245  | -9.05     | 3.95  | 2.20E-02 | -5.29              | 12.62  | 6.75E-01 |
| Subcutaneous Fat | All   | 9887  | -7.29     | 1.53  | 2.04E-06 | 12.21              | 10.23  | 2.32E-01 |
|                  | Men   | 4597  | -16.42    | 1.90  | 8.74E-18 | 28.45              | 14.58  | 1.78E-02 |
|                  | Women | 5290  | 4.35      | 2.43  | 7.38E-02 | 5.47               | 7.61   | 4.72E-01 |
| HDL              | All   | 10660 | -0.86     | 0.58  | 1.38E-01 | 1.52               | 2.15   | 4.79E-01 |
|                  | Men   | 4852  | -2.13     | 0.85  | 1.22E-02 | 0.62               | 3.58   | 8.63E-01 |
|                  | Women | 5808  | 0.52      | 0.79  | 5.07E-01 | 1.92               | 2.60   | 4.60E-01 |
| LDL              | All   | 10227 | -1.64     | 1.36  | 2.28E-01 | 3.88               | 4.96   | 4.35E-01 |
|                  | Men   | 4615  | -8.55     | 2.04  | 2.93E-05 | 7.24               | 7.83   | 3.55E-01 |
|                  | Women | 5612  | 4.70      | 1.83  | 1.02E-02 | 2.22               | 6.17   | 7.19E-01 |
| Cholesterol      | All   | 10658 | -1.39     | 1.46  | 3.41E-01 | 1.55               | 5.42   | 7.74E-01 |
|                  | Men   | 4852  | -6.94     | 2.05  | 7.03E-04 | 0.98               | 8.39   | 9.07E-01 |
|                  | Women | 5806  | 4.80      | 2.08  | 2.13E-02 | 3.55               | 6.89   | 6.06E-01 |
| Triglycerids     | All   | 10644 | -2.16     | 0.73  | 3.21E-03 | -2.59              | 2.72   | 3.42E-01 |
|                  | Men   | 4840  | -3.30     | 1.05  | 1.72E-03 | -3.40              | 4.45   | 4.44E-01 |
|                  | Women | 5804  | -0.95     | 1.03  | 3.55E-01 | -0.74              | 3.35   | 8.26E-01 |
| Pulse            | All   | 10280 | 29.55     | 17.33 | 8.83E-02 | 19.22              | 63.81  | 7.63E-01 |
|                  | Men   | 4662  | 17.44     | 24.78 | 4.82E-01 | -39.43             | 103.02 | 7.02E-01 |
|                  | Women | 5618  | 43.10     | 24.43 | 7.77E-02 | 49.26              | 80.08  | 5.39E-01 |
| Systolic BP      | All   | 10291 | -8.96     | 29.05 | 7.58E-01 | 17.44              | 107.06 | 8.71E-01 |
|                  | Men   | 4663  | 4.31      | 38.87 | 9.12E-01 | 19.73              | 159.32 | 9.01E-01 |
|                  | Women | 5628  | -23.66    | 43.38 | 5.86E-01 | 18.67              | 143.47 | 8.96E-01 |
| Dyastolic BP     | All   | 10293 | 8.46      | 17.83 | 6.35E-01 | -67.32             | 65.72  | 3.06E-01 |
|                  | Men   | 4661  | 33.46     | 24.46 | 1.71E-01 | -39.96             | 98.99  | 6.86E-01 |
|                  | Women | 5632  | -20.51    | 26.10 | 4.32E-01 | -90.02             | 87.57  | 3.04E-01 |

**Supplementary Table 2.  $\beta_{F_{ROH}}$  and  $\beta_{F_{outside\_ROH}}$  estimates for sites with an average night-light intensity below 5.** Sample sizes, effect size estimates, standard errors and associated p-values are shown for the genomic inbreeding coefficient with ROH longer than 1.5Mb ( $F_{ROH}$ ) and for the homozygosity outside ROH ( $F_{outside\_ROH}$ ). The AWI-Gen study sites with an average night-light intensity below 5 are represented in this table: Nanoro (Burkina Faso), Navrongo (Ghana), Dikgale and Agincourt (South Africa). Results are provided for the whole population (All) and by sex.

| Phenotype               | N     | $F_{ROH}$ |         |       | $F_{outside\_ROH}$ |         |        |          |
|-------------------------|-------|-----------|---------|-------|--------------------|---------|--------|----------|
|                         |       | Beta      | SE      | P     | Beta               | SE      | P      |          |
| <b>SES</b>              | All   | 6834      | -7.30   | 2.38  | 2.17E-03           | -8.71   | 12.81  | 4.96E-01 |
|                         | Men   | 2949      | -10.29  | 3.31  | 1.88E-03           |         |        |          |
|                         | Women | 3885      | -4.05   | 3.44  | 2.39E-01           |         |        |          |
| <b>Height</b>           | All   | 6763      | -0.10   | 0.12  | 3.82E-01           | 0.08    | 0.62   | 8.97E-01 |
|                         | Men   | 2943      | 0.07    | 0.17  | 6.66E-01           |         |        |          |
|                         | Women | 3820      | -0.30   | 0.16  | 7.10E-02           |         |        |          |
| <b>Weight</b>           | All   | 6762      | -99.25  | 25.08 | 7.67E-05           | -165.22 | 133.86 | 2.17E-01 |
|                         | Men   | 2943      | -280.02 | 32.25 | 6.34E-18           |         |        |          |
|                         | Women | 3819      | 107.34  | 38.05 | 4.82E-03           |         |        |          |
| <b>BMI</b>              | All   | 6761      | -37.92  | 9.04  | 2.80E-05           | -84.68  | 48.26  | 7.94E-02 |
|                         | Men   | 2943      | -119.20 | 10.92 | 3.13E-27           |         |        |          |
|                         | Women | 3818      | 55.64   | 14.16 | 8.63E-05           |         |        |          |
| <b>Waist/Hip</b>        | All   | 6755      | 0.28    | 0.20  | 1.63E-01           | -0.31   | 1.08   | 7.73E-01 |
|                         | Men   | 2939      | -0.13   | 0.26  | 5.99E-01           |         |        |          |
|                         | Women | 3816      | 0.79    | 0.31  | 1.26E-02           |         |        |          |
| <b>Visceral Fat</b>     | All   | 6441      | -5.84   | 3.05  | 5.56E-02           | -15.32  | 16.26  | 3.46E-01 |
|                         | Men   | 2817      | -6.69   | 3.95  | 9.02E-02           |         |        |          |
|                         | Women | 3624      | -4.80   | 4.67  | 3.05E-01           |         |        |          |
| <b>Subcutaneous Fat</b> | All   | 6537      | -13.34  | 1.89  | 2.07E-12           | 9.66    | 10.01  | 3.35E-01 |
|                         | Men   | 2870      | -24.97  | 2.40  | 7.71E-25           |         |        |          |
|                         | Women | 3667      | 0.63    | 2.92  | 8.29E-01           |         |        |          |
| <b>HDL</b>              | All   | 7150      | -0.99   | 0.66  | 1.32E-01           | 1.74    | 3.52   | 6.21E-01 |
|                         | Men   | 3122      | -2.21   | 0.99  | 2.48E-02           |         |        |          |
|                         | Women | 4028      | 0.22    | 0.89  | 8.05E-01           |         |        |          |
| <b>LDL</b>              | All   | 6887      | -3.76   | 1.55  | 1.49E-02           | -6.28   | 8.40   | 4.55E-01 |
|                         | Men   | 2970      | -10.45  | 2.22  | 2.71E-06           |         |        |          |
|                         | Women | 3917      | 3.39    | 2.16  | 1.16E-01           |         |        |          |
| <b>Cholesterol</b>      | All   | 7150      | -3.09   | 1.70  | 6.98E-02           | -5.48   | 9.10   | 5.47E-01 |
|                         | Men   | 3122      | -9.27   | 2.38  | 1.02E-04           |         |        |          |
|                         | Women | 4028      | 3.48    | 2.44  | 1.53E-01           |         |        |          |
| <b>Triglycerids</b>     | All   | 7141      | -3.89   | 0.84  | 4.05E-06           | -1.81   | 4.51   | 6.88E-01 |
|                         | Men   | 3115      | -4.32   | 1.21  | 3.55E-04           |         |        |          |
|                         | Women | 4026      | -3.52   | 1.18  | 2.92E-03           |         |        |          |
| <b>Pulse</b>            | All   | 6735      | 39.73   | 20.88 | 5.71E-02           | -5.28   | 111.54 | 9.62E-01 |
|                         | Men   | 2930      | 10.87   | 29.96 | 7.17E-01           |         |        |          |
|                         | Women | 3805      | 71.11   | 29.40 | 1.56E-02           |         |        |          |
| <b>Systolic BP</b>      | All   | 6751      | -22.08  | 34.97 | 5.28E-01           | 68.29   | 186.79 | 7.15E-01 |
|                         | Men   | 2931      | 19.55   | 47.32 | 6.80E-01           |         |        |          |
|                         | Women | 3820      | -67.43  | 51.64 | 1.92E-01           |         |        |          |
| <b>Dyastolic BP</b>     | All   | 6748      | 9.92    | 20.54 | 6.29E-01           | 7.17    | 109.78 | 9.48E-01 |
|                         | Men   | 2929      | 38.07   | 28.72 | 1.85E-01           |         |        |          |
|                         | Women | 3819      | -21.93  | 29.58 | 4.58E-01           |         |        |          |

**Supplementary Table 3.  $\beta_{F_{ROH}}$  and  $\beta_{F_{outside\ ROH}}$  estimates for sites with an average night-light intensity above 5.** Sample sizes, effect size estimates, standard errors and associated p-values are shown for the genomic inbreeding coefficient with ROH longer than 1.5Mb ( $F_{ROH}$ ) and for the homozygosity outside ROH ( $F_{outside\ ROH}$ ). The AWI-Gen study sites with an average night-light intensity above 5 are represented in this table: Nairobi (Kenya) and Soweto (South Africa). Results are provided for the whole population (All) and by sex.

| Phenotype        |       | N    | $F_{ROH}$ |       |          | $F_{outside\_ROH}$ |        |          |
|------------------|-------|------|-----------|-------|----------|--------------------|--------|----------|
|                  |       |      | Beta      | SE    | P        | Beta               | SE     | P        |
| SES              | All   | 3411 | -7.48     | 3.18  | 1.87E-02 | 2.46               | 8.33   | 7.68E-01 |
|                  | Men   | 1733 | 0.63      | 4.30  | 8.83E-01 | -3.25              | 3.12   | 5.23E-01 |
|                  | Women | 1678 | -18.44    | 4.75  | 1.07E-04 | -4.51              | 5.12   | 6.48E-01 |
| Height           | All   | 3411 | -0.19     | 0.16  | 2.27E-01 | 0.44               | 0.45   | 3.20E-01 |
|                  | Men   | 1733 | 0.14      | 0.22  | 5.35E-01 | 0.12               | 0.21   | 4.32E-01 |
|                  | Women | 1678 | -0.64     | 0.23  | 5.72E-03 | 0.75               | 0.54   | 5.89E-01 |
| Weight           | All   | 3410 | -34.71    | 40.96 | 3.97E-01 | -30.85             | 113.32 | 7.85E-01 |
|                  | Men   | 1732 | -13.95    | 50.44 | 7.82E-01 | -5.25              | 98.12  | 9.25E-01 |
|                  | Women | 1678 | -65.31    | 66.91 | 3.29E-01 | -84.31             | 125.23 | 8.12E-01 |
| BMI              | All   | 3410 | -6.13     | 14.92 | 6.81E-01 | -20.87             | 41.26  | 6.13E-01 |
|                  | Men   | 1732 | -10.97    | 16.85 | 5.15E-01 | -12.12             | 10.50  | 5.63E-01 |
|                  | Women | 1678 | -1.36     | 25.84 | 9.58E-01 | -52.12             | 70.23  | 7.45E-01 |
| Waist/Hip        | All   | 3402 | 0.44      | 0.41  | 2.74E-01 | 0.37               | 1.11   | 7.41E-01 |
|                  | Men   | 1731 | 1.03      | 0.50  | 3.87E-02 | -0.09              | 1.23   | 4.81E-01 |
|                  | Women | 1671 | -0.35     | 0.67  | 6.04E-01 | 0.32               | 2.20   | 8.02E-01 |
| Visceral Fat     | All   | 3345 | 0.22      | 4.68  | 9.63E-01 | 6.63               | 12.82  | 6.05E-01 |
|                  | Men   | 1724 | 10.88     | 6.36  | 8.73E-02 | 0.21               | 4.23   | 5.97E-01 |
|                  | Women | 1621 | -15.45    | 6.95  | 2.64E-02 | -1.23              | 6.23   | 4.06E-01 |
| Subcutaneous Fat | All   | 3350 | 5.55      | 2.43  | 2.25E-02 | -8.44              | 6.66   | 2.21E-01 |
|                  | Men   | 1727 | -0.49     | 2.88  | 8.65E-01 | 4.32               | 3.12   | 4.00E-01 |
|                  | Women | 1623 | 14.25     | 4.15  | 6.12E-04 | -0.54              | 1.54   | 8.17E-01 |
| HDL              | All   | 3510 | -0.38     | 1.13  | 7.35E-01 | 0.15               | 3.15   | 9.62E-01 |
|                  | Men   | 1730 | -1.41     | 1.59  | 3.78E-01 | 0.10               | 1.58   | 7.38E-01 |
|                  | Women | 1780 | 0.97      | 1.61  | 5.46E-01 | 0.45               | 6.98   | 9.10E-01 |
| LDL              | All   | 3340 | 5.33      | 2.78  | 5.54E-02 | 11.49              | 6.71   | 8.68E-02 |
|                  | Men   | 1645 | 1.74      | 4.80  | 7.18E-01 | 10.58              | 8.45   | 2.97E-01 |
|                  | Women | 1695 | 7.35      | 3.35  | 2.85E-02 | 2.25               | 2.78   | 6.01E-01 |
| Cholesterol      | All   | 3508 | 2.96      | 2.74  | 2.79E-01 | 2.90               | 7.62   | 7.04E-01 |
|                  | Men   | 1730 | -0.43     | 3.79  | 9.11E-01 | 1.02               | 0.91   | 4.60E-01 |
|                  | Women | 1778 | 7.21      | 3.97  | 6.92E-02 | 3.89               | 2.58   | 5.01E-01 |
| Triglycerids     | All   | 3503 | 1.54      | 1.41  | 2.75E-01 | 0.23               | 3.92   | 9.54E-01 |
|                  | Men   | 1725 | -1.00     | 1.98  | 6.13E-01 | -1.23              | 2.01   | 6.08E-01 |
|                  | Women | 1778 | 4.84      | 2.01  | 1.60E-02 | -2.58              | 3.78   | 2.21E-01 |
| Pulse            | All   | 3545 | 11.52     | 30.34 | 7.04E-01 | -30.19             | 83.79  | 7.19E-01 |
|                  | Men   | 1732 | 29.23     | 42.57 | 4.92E-01 | -45.12             | 50.89  | 8.22E-01 |
|                  | Women | 1813 | -9.99     | 43.46 | 8.18E-01 | 19.21              | 10.39  | 5.18E-01 |
| Systolic BP      | All   | 3540 | 53.30     | 51.45 | 3.00E-01 | -64.50             | 142.15 | 6.50E-01 |
|                  | Men   | 1732 | 15.31     | 67.63 | 8.21E-01 | -15.25             | 25.12  | 8.02E-01 |
|                  | Women | 1808 | 99.78     | 78.73 | 2.05E-01 | -3.65              | 8.68   | 7.12E-01 |
| Dyastolic BP     | All   | 3545 | 8.43      | 34.10 | 8.05E-01 | -72.89             | 94.18  | 4.39E-01 |
|                  | Men   | 1732 | 30.96     | 45.22 | 4.94E-01 | -38.08             | 25.79  | 6.31E-01 |
|                  | Women | 1813 | -20.55    | 51.78 | 6.92E-01 | -102.25            | 94.10  | 5.42E-01 |

**Supplementary Table 4. Effect estimates from bivariate model of Trait ~  $F_{ROH}$  +  $F_{GRM}$ .** Sample sizes, effect size estimates, standard errors and associated p-values are shown for the genomic inbreeding coefficient with ROH longer than 1.5Mb ( $F_{ROH}$ ) and for the inbreeding coefficient using PLINK's  $-ibc$  ( $F_{GRM}$ ). Results are provided for the whole population (All) and by sex.

| Phenotype    |       | N     | $F_{ROH}$ |       |          | $F_{GRM}$ |       |          |
|--------------|-------|-------|-----------|-------|----------|-----------|-------|----------|
|              |       |       | Beta      | SE    | P        | Beta      | SE    | P        |
| SES          | All   | 10191 | -5.99     | 2.50  | 1.67E-02 | -1.30     | 1.75  | 4.59E-01 |
|              | Men   | 4882  | 0.04      | 3.68  | 9.92E-01 | -3.54     | 2.74  | 1.97E-01 |
|              | Women | 5744  | -7.78     | 3.39  | 2.16E-02 | -2.57     | 2.26  | 2.54E-01 |
| Height       | All   | 10174 | -0.18     | 0.12  | 1.45E-01 | 0.05      | 0.09  | 5.37E-01 |
|              | Men   | 4676  | -0.06     | 0.19  | 7.61E-01 | 0.05      | 0.14  | 7.45E-01 |
|              | Women | 5498  | -0.34     | 0.16  | 3.57E-02 | 0.04      | 0.11  | 6.91E-01 |
| Weight       | All   | 10172 | -92.11    | 28.61 | 1.29E-03 | 13.04     | 20.00 | 5.14E-01 |
|              | Men   | 4675  | -52.61    | 16.52 | 1.21E-03 | 35.82     | 27.17 | 1.87E-01 |
|              | Women | 5497  | -116.14   | 38.92 | 1.55E-03 | -6.10     | 26.80 | 8.20E-01 |
| BMI          | All   | 10171 | -28.68    | 10.41 | 5.89E-03 | 1.01      | 7.28  | 8.89E-01 |
|              | Men   | 4675  | -16.80    | 10.77 | 1.53E-02 | 10.95     | 8.76  | 2.11E-01 |
|              | Women | 5496  | -29.45    | 14.50 | 2.47E-03 | -7.43     | 10.15 | 4.64E-01 |
| Waist/Hip    | All   | 10157 | 0.32      | 0.25  | 2.03E-01 | -0.04     | 0.17  | 8.36E-01 |
|              | Men   | 4675  | -52.61    | 36.52 | 1.50E-01 | 35.82     | 27.17 | 1.87E-01 |
|              | Women | 5487  | 0.37      | 0.33  | 2.72E-01 | 0.11      | 0.22  | 6.21E-01 |
| Visceral Fat | All   | 9786  | -4.93     | 3.39  | 1.46E-01 | 0.62      | 2.34  | 7.92E-01 |
|              | Men   | 4541  | -2.91     | 4.78  | 5.42E-01 | 2.90      | 3.54  | 4.12E-01 |
|              | Women | 5245  | -5.65     | 4.74  | 2.34E-01 | -1.35     | 3.04  | 6.58E-01 |
| Subcutaneal  | All   | 9887  | -15.80    | 1.99  | 2.42E-15 | -9.18     | 4.38  | 2.67E-04 |
|              | Men   | 4597  | -18.72    | 2.56  | 3.24E-13 | -11.58    | 5.90  | 1.79E-05 |
|              | Women | 9887  | 15.80     | 1.99  | 2.42E-15 | 9.18      | 3.38  | 2.67E-04 |
| HDL          | All   | 10660 | -0.65     | 0.75  | 3.87E-01 | -0.23     | 0.53  | 6.70E-01 |
|              | Men   | 4852  | -0.93     | 1.20  | 4.36E-01 | -0.52     | 0.90  | 5.64E-01 |
|              | Women | 5808  | -2.01     | 1.25  | 3.21E-02 | 0.56      | 1.52  | 7.14E-01 |
| LDL          | All   | 10227 | -2.19     | 1.75  | 2.12E-01 | 0.62      | 1.25  | 6.21E-01 |
|              | Men   | 4615  | -0.76     | 0.67  | 7.75E-02 | -0.51     | 2.02  | 8.00E-01 |
|              | Women | 5612  | 2.01      | 0.95  | 3.72E-03 | 0.56      | 1.52  | 7.14E-01 |
| Cholesterol  | All   | 10658 | -1.17     | 1.90  | 5.38E-01 | -0.24     | 1.34  | 8.59E-01 |
|              | Men   | 4841  | -1.42     | 1.49  | 3.40E-01 | 0.27      | 1.11  | 8.06E-01 |
|              | Women | 5806  | -2.00     | 2.53  | 4.31E-01 | 0.43      | 1.69  | 8.01E-01 |
| Triglycerids | All   | 10644 | -2.69     | 0.66  | 1.83E-03 | -0.59     | 0.67  | 3.84E-01 |
|              | Men   | 4841  | -2.42     | 0.49  | 3.40E-04 | -0.27     | 1.11  | 8.06E-01 |
|              | Women | 5805  | -3.44     | 1.23  | 5.31E-03 | 0.84      | 0.82  | 3.07E-01 |
| Pulse        | All   | 10280 | 25.80     | 22.69 | 2.56E-01 | 4.06      | 15.88 | 7.98E-01 |
|              | Men   | 4662  | 11.56     | 34.79 | 7.40E-01 | -8.22     | 25.84 | 7.50E-01 |
|              | Women | 5618  | 48.34     | 30.13 | 1.09E-01 | 12.11     | 19.82 | 5.41E-01 |
| Systolic BP  | All   | 10291 | -23.74    | 38.03 | 5.32E-01 | 16.04     | 26.63 | 5.47E-01 |
|              | Men   | 4663  | -4.47     | 53.75 | 9.34E-01 | 24.80     | 40.00 | 5.35E-01 |
|              | Women | 5628  | -57.33    | 53.94 | 2.88E-01 | 4.75      | 35.48 | 8.94E-01 |
| Dyastolic BP | All   | 10293 | 12.07     | 23.35 | 6.05E-01 | -3.92     | 16.35 | 8.11E-01 |
|              | Men   | 4661  | 27.02     | 33.39 | 4.18E-01 | 5.74      | 24.85 | 8.17E-01 |
|              | Women | 5632  | -7.77     | 32.94 | 8.14E-01 | -13.29    | 21.67 | 5.39E-01 |

**Supplementary Table 5. Protein coding genes present in the genomic window exhibiting an inbreeding depression effect on BMI in men.** Chromosome, start and end, gene name, Ensembl gene ID and a short description is given for every protein coding gene present in the window.

| Chr. | Start    | End      | Gene    | Ensembl gene Id | Description                                           |
|------|----------|----------|---------|-----------------|-------------------------------------------------------|
| 14   | 62699454 | 63102037 | KCNH5   | ENSG00000140015 | Potassium voltage-gated channel subfamily             |
| 14   | 63204114 | 63293219 | RHOJ    | ENSG00000126785 | Ras homolog family member J                           |
| 14   | 63312835 | 63318879 | GPHB5   | ENSG00000179600 | Glycoprotein hormone beta 5                           |
| 14   | 63371357 | 63543374 | PPP2R5E | ENSG00000154001 | Protein phosphatase 2 regulatory subunit B'epsilon    |
| 14   | 63597039 | 63641861 | WDR89   | ENSG00000140006 | WD repeat domain 89                                   |
| 14   | 63684214 | 63728039 | SGPP1   | ENSG00000126821 | Sphingosine-1-phosphate phosphatase 1                 |
| 14   | 63852983 | 64226433 | SYNE2   | ENSG00000054654 | Spectrin repeat containing nuclear envelope protein 2 |
| 14   | 64084232 | 64338112 | ESR2    | ENSG00000140009 | Estrogen receptor 2                                   |
| 14   | 64388031 | 64463457 | MTHFD1  | ENSG00000100714 | Methylenetetrahydrofolate dehydrogenase,              |
| 14   | 64449106 | 64505213 | ZBTB25  | ENSG00000089775 | Zinc finger and BTB domain containing 25              |
| 14   | 64465499 | 64474503 | AKAP5   | ENSG00000179841 | A-kinase anchoring protein 5                          |
| 14   | 64503712 | 64533690 | ZBTB1   | ENSG00000126804 | Zinc finger and BTB domain containing 1               |
| 14   | 64535905 | 64546173 | HSPA2   | ENSG00000126803 | Heat shock protein family A (Hsp70) member 2          |
| 14   | 64549902 | 64589380 | PPP1R36 | ENSG00000165807 | Protein phosphatase 1 regulatory subunit 36           |
| 14   | 64704102 | 64750247 | PLEKHG3 | ENSG00000126822 | Pleckstrin homology and RhoGEF domain containing G3   |
| 14   | 64746283 | 64879907 | SPTB    | ENSG00000070182 | Spectrin beta, erythrocytic                           |
| 14   | 64914361 | 64944591 | CHURC1  | ENSG00000258289 | Churchill domain containing 1                         |
| 14   | 64914485 | 65061803 | CHURC1- | ENSG00000125954 | CHURC1-FNTB readthrough                               |
| 14   | 64939152 | 64942905 | GPX2    | ENSG00000176153 | Glutathione peroxidase 2                              |
| 14   | 64945814 | 64973226 | RAB15   | ENSG00000139998 | RAB15, member RAS oncogene family                     |
| 14   | 64986720 | 65062652 | FNTB    | ENSG00000257365 | Farnesyltransferase, CAAX box, beta                   |
| 14   | 65006174 | 65102695 | MAX     | ENSG00000125952 | MYC associated factor X                               |
| 14   | 65410592 | 65744121 | FUT8    | ENSG00000033170 | Fucosyltransferase 8                                  |

**Supplementary Table 6. Protein coding genes present in the genomic windows exhibiting an inbreeding depression effect on VAT in women.** Chromosome, start and end, gene name, Ensembl gene ID and a short description is given for every protein coding gene present in the two windows.

| Chr. | Start    | End      | Gene    | Ensembl gene Id | Description                                  |
|------|----------|----------|---------|-----------------|----------------------------------------------|
| 2    | 38814    | 46870    | FAM110C | ENSG00000184731 | Family with sequence similarity 110 member C |
| 2    | 217730   | 266398   | SH3YL1  | ENSG00000035115 | SH3 and SYLF domain containing 1             |
| 2    | 264140   | 278283   | ACP1    | ENSG00000143727 | Acid phosphatase 1                           |
| 2    | 279558   | 288851   | ALKAL2  | ENSG00000189292 | ALK and LTK ligand 2                         |
| 2    | 667335   | 677439   | TMEM18  | ENSG00000151353 | Transmembrane protein 18                     |
| 2    | 950868   | 1367613  | SNTG2   | ENSG00000172554 | Syntrophin gamma 2                           |
| 2    | 1374066  | 1543711  | TPO     | ENSG00000115705 | Thyroid peroxidase                           |
| 2    | 1631887  | 1744852  | PXDN    | ENSG00000130508 | Peroxidasin                                  |
| 2    | 1789113  | 2331664  | MYT1L   | ENSG00000186487 | Myelin transcription factor 1 like           |
| 4    | 56977722 | 57031168 | POLR2B  | ENSG00000047315 | RNA polymerase II subunit B                  |
| 4    | 57030773 | 57110385 | IGFBP7  | ENSG00000163453 | Insulin like growth factor binding protein 7 |

**Supplementary Table 7. Median and interquartile range (IQR) of the genomic inbreeding coefficient ( $F_{ROH}$ ) in sampling sites.**

| Site      | $F_{ROH}$ |        |
|-----------|-----------|--------|
|           | Median    | IQR    |
| Agincourt | 0.0072    | 0.0042 |
| Dikgale   | 0.0062    | 0.0041 |
| Nairobi   | 0.0043    | 0.0039 |
| Soweto    | 0.0061    | 0.0037 |
| Nanoro    | 0.0026    | 0.0031 |

**Supplementary Figure 1. Q-Q plots. a:** Inbreeding depression on body mass index (BMI) for men.  
**b:** Inbreeding depression on visceral adipose tissue (VAT) for women.

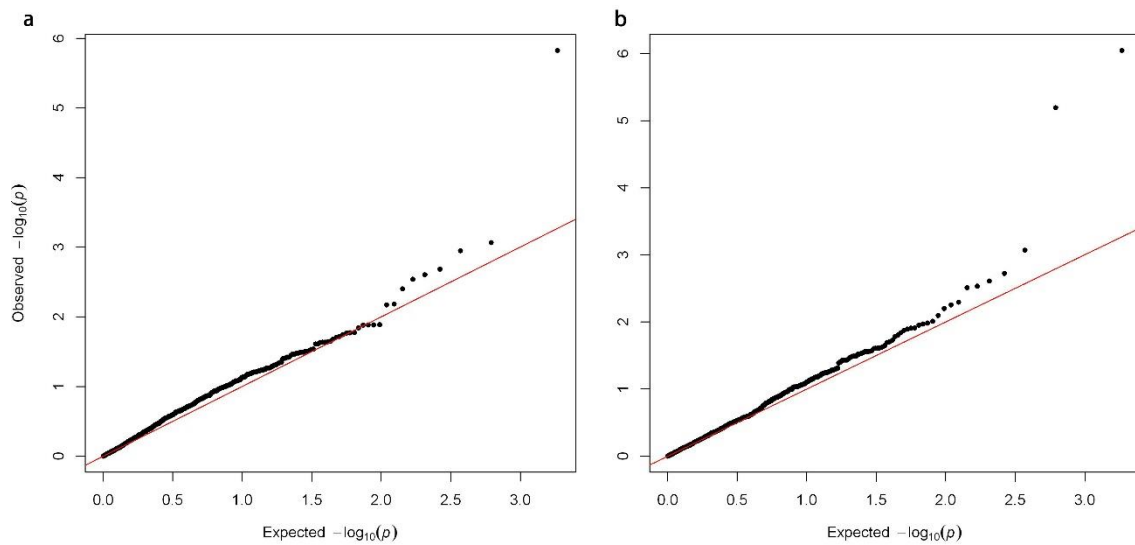

Supplement: 41467_2020_19595_MOESM1_ESM.pdf [file 41467_2020_19595_MOESM1_ESM.pdf]
